# Supplementary material for: Psychoactive substance use by truck drivers: a systematic review
Source: PubMed Central journal article supplement — Occup Environ Med. 2013 Oct 21;71(1):71–6. doi: 10.1136/oemed-2013-101452 (PMC3888602; doi:10.1136/oemed-2013-101452), 2013-10-21
Supplement: oemed-2013-101452-s1.pdf [file oemed-2013-101452-s1.pdf]

## Online Supplemental Material

### Appendice 1

#### SEARCH HISTORY (April 30, 2013)

| Search                     | Query                                                                                   | Items found                    |
|----------------------------|-----------------------------------------------------------------------------------------|--------------------------------|
| <a href="#"><u>#27</u></a> | Search #6 AND #13 AND #26                                                               | <a href="#"><u>219</u></a>     |
| <a href="#"><u>#26</u></a> | Search #14 OR #15 OR #16 OR #17 OR #18 OR #19 OR #20 OR #21 OR #22 OR #23 OR #24 OR #25 | <a href="#"><u>1549030</u></a> |
| <a href="#"><u>#25</u></a> | Search caffeine*[Title/Abstract]                                                        | <a href="#"><u>21162</u></a>   |
| <a href="#"><u>#24</u></a> | Search alcohol*[Title/Abstract]                                                         | <a href="#"><u>221124</u></a>  |
| <a href="#"><u>#23</u></a> | Search crack*[Title/Abstract]                                                           | <a href="#"><u>10879</u></a>   |
| <a href="#"><u>#22</u></a> | Search marijuana*[Title/Abstract]                                                       | <a href="#"><u>7477</u></a>    |
| <a href="#"><u>#21</u></a> | Search cocaine*[Title/Abstract]                                                         | <a href="#"><u>28315</u></a>   |
| <a href="#"><u>#20</u></a> | Search amphetamine*[Title/Abstract]                                                     | <a href="#"><u>20156</u></a>   |
| <a href="#"><u>#19</u></a> | Search psychoactive*[Title/Abstract]                                                    | <a href="#"><u>5610</u></a>    |
| <a href="#"><u>#18</u></a> | Search medication*[Title/Abstract]                                                      | <a href="#"><u>179100</u></a>  |
| <a href="#"><u>#17</u></a> | Search medicine*[Title/Abstract]                                                        | <a href="#"><u>281099</u></a>  |
| <a href="#"><u>#16</u></a> | Search substance*[Title/Abstract]                                                       | <a href="#"><u>211584</u></a>  |
| <a href="#"><u>#15</u></a> | Search stimulant*[Title/Abstract]                                                       | <a href="#"><u>18960</u></a>   |
| <a href="#"><u>#14</u></a> | Search drug*[Title/Abstract]                                                            | <a href="#"><u>723576</u></a>  |
| <a href="#"><u>#13</u></a> | Search #7 or #8 or #9 or #10 or #11 or #12                                              | <a href="#"><u>325871</u></a>  |
| <a href="#"><u>#12</u></a> | Search professional*[Title/Abstract]                                                    | <a href="#"><u>162458</u></a>  |
| <a href="#"><u>#11</u></a> | Search job*[Title/Abstract]                                                             | <a href="#"><u>39517</u></a>   |
| <a href="#"><u>#10</u></a> | Search worker*[Title/Abstract]                                                          | <a href="#"><u>120048</u></a>  |
| <a href="#"><u>#9</u></a>  | Search conductor*[Title/Abstract]                                                       | <a href="#"><u>4223</u></a>    |
| <a href="#"><u>#8</u></a>  | Search driver*[Title/Abstract]                                                          | <a href="#"><u>21462</u></a>   |
| <a href="#"><u>#7</u></a>  | Search motorist*[Title/Abstract]                                                        | <a href="#"><u>353</u></a>     |
| <a href="#"><u>#6</u></a>  | Search #1 OR #2 OR #3 OR #4 OR #5                                                       | <a href="#"><u>2790</u></a>    |
| <a href="#"><u>#5</u></a>  | Search heavy transport*[Title/Abstract]                                                 | <a href="#"><u>8</u></a>       |
| <a href="#"><u>#4</u></a>  | Search heavy vehicle*[Title/Abstract]                                                   | <a href="#"><u>108</u></a>     |
| <a href="#"><u>#3</u></a>  | Search lorries[Title/Abstract]                                                          | <a href="#"><u>47</u></a>      |
| <a href="#"><u>#2</u></a>  | Search lorry[Title/Abstract]                                                            | <a href="#"><u>143</u></a>     |
| <a href="#"><u>#1</u></a>  | Search truck*[Title/Abstract]                                                           | <a href="#"><u>2532</u></a>    |
