# Supplementary material for: Psychoactive substance use by truck drivers: a systematic review
Source: PubMed Central journal article supplement — Occup Environ Med. 2013 Oct 21;71(1):71–6. doi: 10.1136/oemed-2013-101452 (PMC3888602; doi:10.1136/oemed-2013-101452), 2013-10-21
Supplement: oemed-2013-101452-s2.pdf [file oemed-2013-101452-s2.pdf]

## Online Supplemental Material

### Appendice 2

#### ARTICLES EXCLUDED AFTER COMPLETE READING

##### NO ESPECIFIC INFORMATION

Abiona TC, Aloba OO, Fatoye FO. Pattern of alcohol consumption among commercial road transport workers in a semi-urban community in south western Nigeria. *East Afr Med J* 2006;**83**:494-9.

Elliott S, Woolacott H, Braithwaite R. The prevalence of drugs and alcohol found in road traffic fatalities: a comparative study of victims. *Sci Justice* 2009;**49**:19-23.

Haleem K, Gan A. Identifying traditional and nontraditional predictors of crash injury severity on major urban roadways. *Traffic Inj Prev* 2011;**12**:223-34.

Kazanga I, Tameni S, Piccinotti A et al. Prevalence of drug abuse among workers: strengths and pitfalls of the recent Italian Workplace Drug Testing (WDT) legislation. *Forensic Sci Int* 2012;**215**:46-50.

Kintz P, Cirimele V, Mairot F et al. [Drug tests on 198 drivers involved in an accident]. *Presse Med* 2000;**29**:1275-8.

Leechawengwongs M, Leechawengwongs E, Sukying C et al. Role of drowsy driving in traffic accidents: a questionnaire survey of Thai commercial bus/truck drivers. *J Med Assoc Thai* 2006;**89**:1845-50.

McCree DH, Cosgrove S, Stratford D et al. Sexual and drug use risk behaviors of long-haul truck drivers and their commercial sex contacts in New Mexico. *Public Health Rep* 2010;**125**:52-60.

Roohanna R. A pilot study of alcohol drinkers in Ahwaz, Iran. *Int J Addict* 1986;**21**:399-410.

Soderstrom CA, Dischinger PC, Kufera JA et al. Crash culpability relative to age and sex for injured drivers using alcohol, marijuana or cocaine. *Annu Proc Assoc Adv Automot Med* 2005;**49**:327-41.

Watson WA, Garriott JC. Alcohol and motorcycle riders: a comparison of motorcycle and car/truck DWIs. *Vet Hum Toxicol* 1992;**34**:213-5.

##### NO RESULTS OF INTEREST

Bjerre B, Kostela J. Primary prevention of drink driving by the large-scale use of alcolocks in commercial vehicles. *Accid Anal Prev* 2008;**40**:1294-9.

Gerevich J, Bolla K, Toth K et al. The effect of Grandaxin on lorry drivers. *Ther Hung* 1975;**23**:143-6.

Heaton K, Browning S, Anderson D. Identifying variables that predict falling asleep at the wheel among long-haul truck drivers. *AAOHN J* 2008;**56**:379-85.

Heaton KL, Rayens MK. Feedback actigraphy and sleep among long-haul truck drivers. *AAOHN J* 2010;**58**:137-45.

Moreno CR, Carvalho FA, Lorenzi C et al. High risk for obstructive sleep apnea in truck drivers estimated by the Berlin questionnaire: prevalence and associated factors. *Chronobiol Int* 2004;**21**:871-9.

Pasqua IC, Moreno CRC. Consumo de substâncias estimulantes e depressoras do sistema nervoso por motoristas de caminhão. *Nutr Bras* 2003;**2**:4-12.

Pidetcha P, Congpuong P, Putriprawan T et al. Screening for urinary amphetamine in truck drivers and drug addicts. *J Med Assoc Thai* 1995;**78**:554-8.

Qirjako G, Burazeri G, Hysa B et al. Factors associated with fatal traffic accidents in Tirana, Albania: cross-sectional study. *Croat Med J* 2008;**49**:734-40.

Swena DD, Gaines Jr. W. Effect of random drug screening on fatal commercial truck accident rates. *Int J Drug Test* 1999;**2**:1-13.

Williamson AM, Feyer AM, Mattick RP et al. Developing measures of fatigue using an alcohol comparison to validate the effects of fatigue on performance. *Accid Anal Prev* 2001;**33**:313-26.

## LITERATURE REVIEW

Apostolopoulos Y, Sönmez S, Shattell MM. Worksite-induced morbidities among truck drivers in the United States. *AAOHN J* 2010;**58**:285-96.

Cashman CM, Ruotsalainen JH, Greiner BA et al. Alcohol and drug screening of occupational drivers for preventing injury. *Cochrane Database Syst Rev* 2009:CD006566.

Horne J, Reyner L. Vehicle accidents related to sleep: a review. *Occup Environ Med* 1999;**56**:289-94.

Robb G, Sultana S, Ameratunga S et al. A systematic review of epidemiological studies investigating risk factors for work-related road traffic crashes and injuries. *Inj Prev* 2008;**14**:51-8.

## QUALITATIVE STUDIES

Davey J, Richards N, Freeman J. Fatigue and beyond: patterns of and motivations for illicit drug use among long-haul truck drivers. *Traffic Inj Prev* 2007;**8**:253-9.

Moreno CRdC, Rotenberg L. Fatores determinantes da atividade dos motoristas de caminhão e repercussões à saúde: um olhar a partir da análise coletiva do trabalho. *Rev Bras Saúde Ocup* 2009;**34**:128-138.

Apostolopoulos Y, Sönmez S, Massengale K. Sexual mixing, drug exchanges, and infection risk among long-haul truck drivers. *J Community Health* 2013;**38**:385-91.

## LETTER TO THE EDITOR

Gordon SF. Alcoholism and semi-truck drivers. *Iowa Med* 1990;**80**:487.

Oliveira LGd, Yonamine M, Andreuceti G et al. Alcohol and other drug use by Brazilian truck drivers: a cause for concern? *Rev Bras Psiquiatr* 2012;**34**:116-7.

## **CLINICAL TRIAL**

Bjerre B. Primary and secondary prevention of drink driving by the use of alcolock device and program: Swedish experiences. *Accid Anal Prev* 2005;**37**:1145-52.

## **DUPLICATED DATA**

Drummer OH, Gerostamoulos J, Batziris H et al. The involvement of drugs in drivers of motor vehicles killed in Australian road traffic crashes. *Accid Anal Prev* 2004;**36**:239-48.
