# Supplementary material for: Psychoactive substance use by truck drivers: a systematic review
Source: PubMed Central journal article supplement — Occup Environ Med. 2013 Oct 21;71(1):71–6. doi: 10.1136/oemed-2013-101452 (PMC3888602; doi:10.1136/oemed-2013-101452), 2013-10-21
Supplement: oemed-2013-101452-s3.pdf [file oemed-2013-101452-s3.pdf]

**Table 1S:** Description of the studies on psychoactive substance use by truck drivers.

| Author(s)                                             | Country<br>Year        | Characteristics of participants |                                            | Form of<br>obtaining<br>data | Main psychoactive substances evaluated                                                                                                                                 |
|-------------------------------------------------------|------------------------|---------------------------------|--------------------------------------------|------------------------------|------------------------------------------------------------------------------------------------------------------------------------------------------------------------|
|                                                       |                        | N<br>Age (years)<br>Gender      | Criteria for inclusion                     |                              |                                                                                                                                                                        |
| Guinn, 1983 <sup>11</sup>                             | USA<br>1981-1982       | 112<br>NA<br>NA                 | Drivers of tractor-trailer trucks          | SR                           | Drugs for the purpose of remaining awake and alert while trucking (non-specified drugs)                                                                                |
| Lund <i>et al.</i> , 1988 <sup>7</sup>                | USA<br>1986            | 317<br>NA<br>NA                 | Drivers of trucks weighing more than 4.5t  | U/B                          | Alcohol, amphetamines, cannabinoids, cocaine, ephedrine/phenylpropanolamine/pseudoephedrine, phentermine                                                               |
| Mongkolsirichaikul <i>et al.</i> , 1988 <sup>12</sup> | Thailand<br>1987       | 57<br>22-45<br>NA               | NA                                         | U                            | Amphetamines                                                                                                                                                           |
| Crouch <i>et al.</i> , 1993 <sup>8</sup>              | USA<br>1987-1988       | 168<br>NA<br>NA                 | Drivers of trucks weighing more than 4.5t  | B                            | Alcohol, amphetamines, caffeine, cannabinoids, cocaine, codeine, ephedrine/ phenylpropanolamine/pseudoephedrine, opiates                                               |
| Korelitz <i>et al.</i> , 1993 <sup>13</sup>           | USA<br>1988            | 2945<br>18+<br>M                | NA                                         | SR                           | Alcohol                                                                                                                                                                |
| Mabbott <i>et al.</i> , 1999 <sup>14</sup>            | Australia<br>1997      | 236<br>21-69<br>M/F             | NA                                         | SR                           | Illicit stimulant (amphetamines), over-the-counter stimulants (herbal drugs, caffeine tablets, pseudoephedrine), prescription stimulants (phentermine, diethylpropion) |
| Couper <i>et al.</i> , 2002a <sup>15*</sup>           | USA<br>1998            | 361<br>NA<br>NA                 | NA                                         | B/U                          | Alcohol, amphetamines, antihistamines, caffeine, cannabinoids, cocaine, ephedrine/pseudoephedrine, opiates                                                             |
| Couper <i>et al.</i> , 2002b <sup>15*</sup>           | USA<br>1999            | 461<br>NA<br>NA                 | NA                                         | B/U                          | Alcohol, amphetamines, antihistamines, caffeine, cannabinoids, cocaine, ephedrine/pseudoephedrine, opiates                                                             |
| Drummer <i>et al.</i> , 2003 <sup>16</sup>            | Australia<br>1990-1999 | 139<br>NA<br>M/F                | Truckers killed in motor vehicle accidents | B                            | Alcohol, benzodiazepines, stimulants, cannabinoids, opiates                                                                                                            |
| Silva <i>et al.</i> , 2003 <sup>17</sup>              | Brazil                 | 728                             | Drivers who were not under                 | U                            | Amphetamines, cannabinoids, cocaine                                                                                                                                    |

| Author(s)                                       | Country<br>Year        | Characteristics of participants |                                                                                         | Form of<br>obtaining<br>data | Main psychoactive substances evaluated            |
|-------------------------------------------------|------------------------|---------------------------------|-----------------------------------------------------------------------------------------|------------------------------|---------------------------------------------------|
|                                                 |                        | N<br>Age (years)<br>Gender      | Criteria for inclusion                                                                  |                              |                                                   |
|                                                 | NA                     | NA<br>NA                        | suspicion of having driven<br>under the influence of drugs                              |                              |                                                   |
| Yildirim, 2003 <sup>18</sup>                    | Turkey<br>1999         | 500<br>NA<br>NA                 | Long-distance drivers                                                                   | SR                           | Gripin® (Drug containing caffeine)                |
| Souza <i>et al.</i> , 2005 <sup>19</sup>        | Brazil<br>NA           | 260<br>21-79<br>M               | NA                                                                                      | SR                           | Alcohol, amphetamines, caffeine                   |
| Moreno <i>et al.</i> , 2006 <sup>20</sup>       | Brazil<br>NA           | 4878<br>40±10<br>M              | NA                                                                                      | SR                           | Alcohol                                           |
| Domingos <i>et al.</i> ,<br>2007 <sup>21</sup>  | Brazil<br>2006         | 1014<br>18-72<br>M/F            | NA                                                                                      | SR                           | Alcohol                                           |
| Drummer <i>et al.</i> ,<br>2007 <sup>22</sup>   | Australia<br>2004-2005 | 318<br>NA<br>M/F                | Drivers of trucks weighing<br>more than 4.5t                                            | OF/B                         | Alcohol, amphetamines, cannabinoids               |
| Nascimento <i>et al.</i> ,<br>2007 <sup>5</sup> | Brazil<br>2005         | 91<br>NA<br>NA                  | Long-distance truck drivers                                                             | SR                           | Alcohol, amphetamines                             |
| Sakurai <i>et al.</i> , 2007 <sup>23</sup>      | Japan<br>2004-2005     | 1465<br>20-69<br>M              | NA                                                                                      | SR                           | Alcohol                                           |
| Snowden <i>et al.</i> , 2007 <sup>24</sup>      | US<br>1988-2003        | 71.606<br>21-65<br>NA           | Drivers of trucks weighing<br>more than 4.5t involved in a<br>fatal motor vehicle crash | B                            | Alcohol                                           |
| Williamson, 2007a <sup>25*</sup>                | Australia<br>1991      | 970<br>NA<br>M/F                | Long-distance drivers,<br>completing trips of at least<br>300 km                        | SR                           | Psychostimulant drugs to stay awake while driving |

| Author(s)                                          | Country<br>Year     | Characteristics of participants |                                                                                      | Form of<br>obtaining<br>data | Main psychoactive substances evaluated                                                              |
|----------------------------------------------------|---------------------|---------------------------------|--------------------------------------------------------------------------------------|------------------------------|-----------------------------------------------------------------------------------------------------|
|                                                    |                     | N<br>Age (years)<br>Gender      | Criteria for inclusion                                                               |                              |                                                                                                     |
| Williamson, 2007b <sup>25*</sup>                   | Australia<br>1998   | 1,007<br>NA<br>M/F              | Long-distance drivers,<br>completing trips of at least<br>300 km                     | SR                           | Psychostimulant drugs                                                                               |
| Gay Anderson <i>et al.</i> ,<br>2008 <sup>26</sup> | US<br>2003-2006     | 987<br>≥21<br>M/F               | Those who spend one or more<br>nights away from home and<br>ability to speak English | SR                           | Alcohol                                                                                             |
| Labat <i>et al.</i> , 2008 <sup>6</sup>            | France<br>2003-2004 | 1,000<br>18-65<br>M/F           | NA                                                                                   | U                            | Alcohol, amphetamines, benzodiazepines, buprenorphine,<br>cannabinoids, cocaine, opiates, methadone |
| Penteado <i>et al.</i> , 2008 <sup>27</sup>        | Brazil<br>2005      | 400<br>21-65<br>M               | NA                                                                                   | SR                           | Alcohol, coffee, energetic drinks, illicit drugs (cocaine, cannabis,<br>crack), stimulants          |
| Domingos <i>et al.</i> ,<br>2010 <sup>28</sup>     | Brazil<br>2007      | 827<br>≥18<br>M/F               | NA                                                                                   | SR                           | Alcohol                                                                                             |
| Jora <i>et al.</i> , 2010 <sup>29</sup>            | Brazil<br>2008      | 496<br>>18<br>M/F               | NA                                                                                   | SR                           | Alcohol                                                                                             |
| Masson <i>et al.</i> , 2010a <sup>30</sup>         | Brazil<br>2005      | 50<br>≥20<br>M                  | NA                                                                                   | SR                           | Alcohol, psychoactive drugs                                                                         |
| Masson <i>et al.</i> , 2010b <sup>31</sup>         | Brazil<br>2008      | 105<br>≥20<br>M                 | NA                                                                                   | SR                           | Alcohol, amphetamines.                                                                              |
| Mieczkowski, 2010 <sup>32</sup>                    | USA<br>NA           | 1,458<br>NA<br>NA               | NA                                                                                   | U/H                          | Amphetamines, cannabinoids, cocaine, opiates                                                        |
| Riva <i>et al.</i> , 2010 <sup>33</sup>            | Italy<br>2008       | 226<br>42.7±9.5                 | NA                                                                                   | SR                           | Alcohol, amphetamines, cannabinoids, cocaine, ecstasy, methadone,<br>opiates                        |

| Author(s)                                      | Country<br>Year      | Characteristics of participants |                                                                                                                                                   | Form of<br>obtaining<br>data | Main psychoactive substances evaluated                                     |
|------------------------------------------------|----------------------|---------------------------------|---------------------------------------------------------------------------------------------------------------------------------------------------|------------------------------|----------------------------------------------------------------------------|
|                                                |                      | N<br>Age (years)<br>Gender      | Criteria for inclusion                                                                                                                            |                              |                                                                            |
| Laraqui <i>et al.</i> , 2011 <sup>34</sup>     | Morocco<br>2004-2008 | NA<br>2,134<br>39.3±7.7<br>NA   | NA                                                                                                                                                | SR                           | Alcohol, cannabinoids, coffee, psychotropic medicines                      |
| Gjerde <i>et al.</i> , 2012 <sup>35</sup>      | Norway<br>2008-2009  | 882<br>NA<br>M/F                | NA                                                                                                                                                | OF                           | Alcohol, amphetamines, cannabinoids, cocaine, codeine, morphine            |
| Leyton <i>et al.</i> , 2012 <sup>36</sup>      | Brazil<br>2009       | 452<br>40±10.8<br>M             | Drivers of trucks weighing<br>more than 30t                                                                                                       | U<br>SR                      | Amphetamines, cannabinoids, cocaine                                        |
| Mir <i>et al.</i> , 2012 <sup>37</sup>         | Pakistan<br>2008     | 461<br>18-68<br>M               | Drivers who drove more than<br>160 km daily                                                                                                       | SR                           | Alcohol, cannabinoids                                                      |
| Knauth <i>et al.</i> , 2012 <sup>39</sup>      | Brazil<br>2006       | 854<br>NA<br>NA                 | NA                                                                                                                                                | SR                           | Alcohol, amphetamines, caffeine, energy drinks, guarana powder,<br>cocaine |
| Yonamine <i>et al.</i> ,<br>2013 <sup>38</sup> | Brazil<br>2002-2008  | 1,277<br>18-80<br>M             | NA                                                                                                                                                | U<br>SR                      | Alcohol, amphetamines, cannabinoids, cocaine                               |
| Gates <i>et al.</i> , 2013 <sup>40</sup>       | USA<br>1993-2008     | 10,190<br>NA<br>M/F             | Drivers aged 20 years or over<br>who were driving a truck-<br>tractor or a truck with a gross<br>vehicle weight rating greater<br>than 26,000 lbs | U/B                          | Amphetamines, cocaine, benzoylecgonine, phentermine,<br>chlorphentermine   |

**B:** blood; **H:** hair; **NA:** not available; **OF:** oral fluid; **SR:** self-report; **U:** urine; **USA:** United States of America; \*Refer to results of two investigations published in one article.
